# Supplementary material for: Enhancement of vitamin B6 levels in rice expressing Arabidopsis vitamin B6 biosynthesis de novo genes
Source: PubMed Central journal article supplement (PMC6852651; doi:10.1111/tpj.14379), 2019-07-11
Supplement: TPJ-99-1047-s001.pdf [file TPJ-99-1047-s001.pdf]

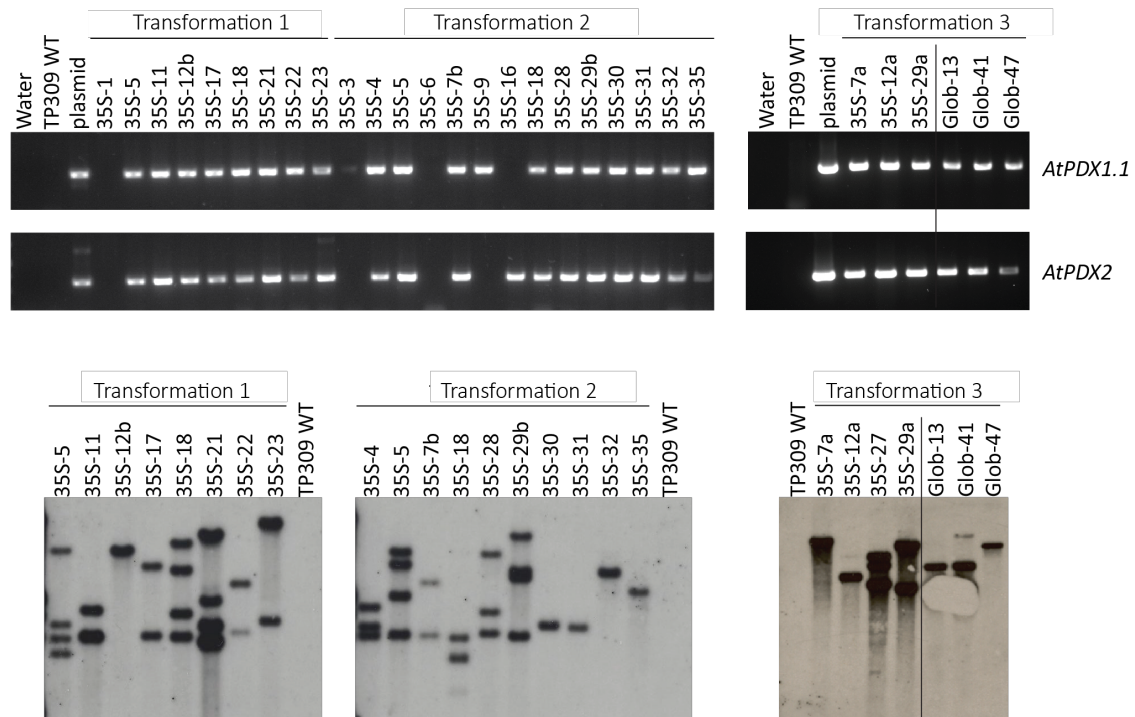

**Figure S1. Molecular characterization of the generated dual-expressing *AtPDX1.1* and *AtPDX2* transgenic rice lines in the  $T_0$  generation.**

Transformation 1, 2 and 3 refer to the three independent transformations performed to generate transgenic rice lines having constitutive expression (called 35S lines). A small pool of endosperm-specific expression lines (called *Glob* lines) were also generated. The construct used for the latter lines was the same as that shown in **Figure 2a**, with the exception that the *CaMV 35S* promoter was replaced with the *globulin* promoter. **(a)** Identification of putative transformants by PCR for *AtPDX1.1* and *AtPDX2* transgenes. **(b)** Determination of T-DNA integration and copy number by Southern blot, employing a probe against the *hptII* gene.

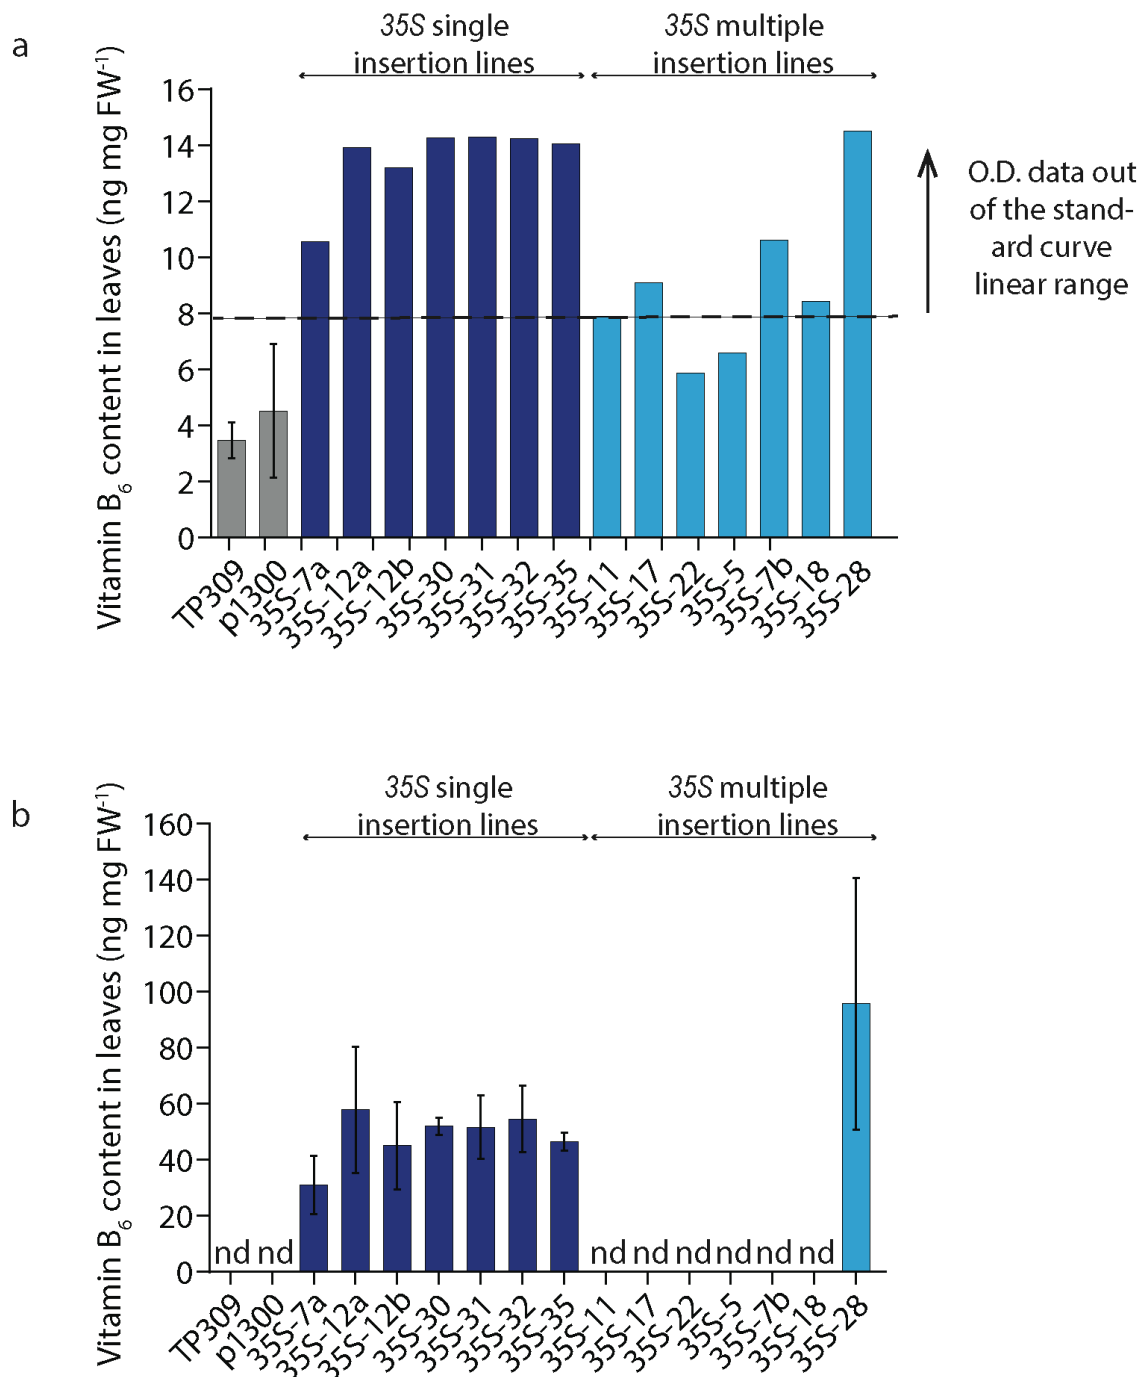

**Figure S2. Analysis of total vitamin B<sub>6</sub> contents of transgenic rice lines in the T<sub>1</sub> generation.**

Vitamin B<sub>6</sub> quantification by a yeast bioassay in leaves of 45-day-old plants. **(a)** Vitamin B<sub>6</sub> content in undiluted leaf sample extracts. Average  $\pm$  S.D. of 3 biological replicates (except for 35S-7a (n = 2) and 35S-7b (n = 1)). Standard deviation is not indicated for samples with at least one O.D. (optical density) value above the linear range of the standard curve indicated by the area above the dotted line. **(b)** Vitamin B<sub>6</sub> content in 30-fold diluted leaf sample extracts. Average  $\pm$  S.D. of 3 biological replicates (except for 35S-7a (n = 2) and 35S-7b (n = 1)). nd: not detected.

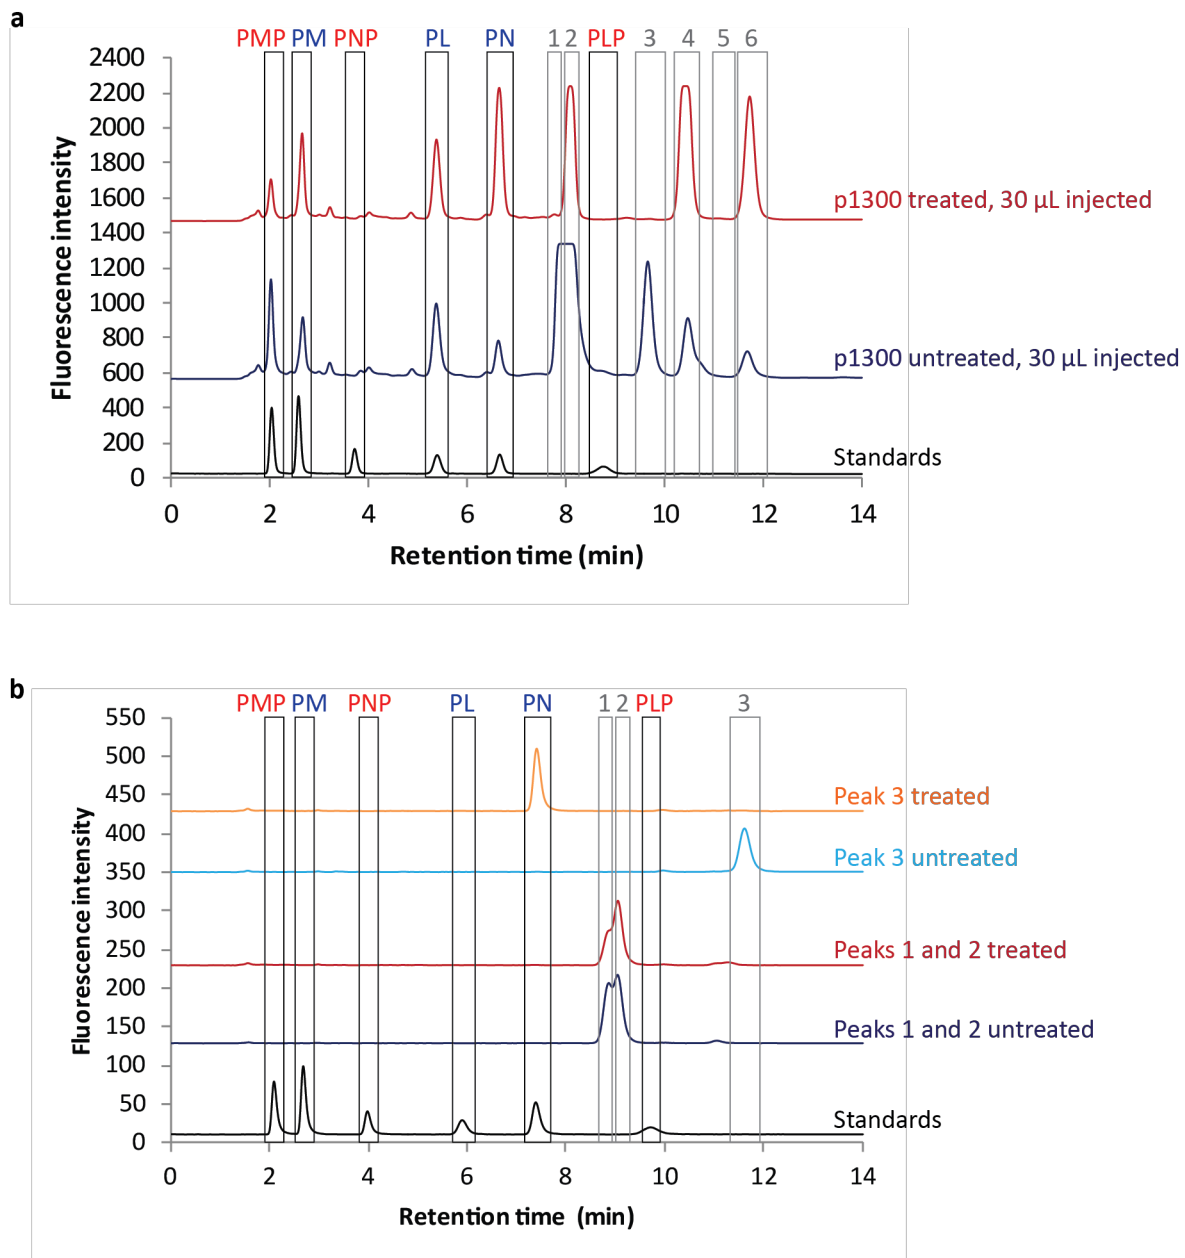

**Figure S3. Assignment of a glucosylated B<sub>6</sub> vitamer in rice leaf extracts.**

**(a)** Elution profiles of leaf extracts before (blue) and after (red)  $\beta$ -glucosidase treatment using the transgenic control line p1300. To facilitate the visualization, untreated and treated sample profiles were offset by 500 and 1400 respectively, with respect to the baseline of the standards. See **Figure 5** for numbering scheme of peaks 1-6. **(b)** Elution profiles of the individual peaks 1/2 or 3 before and after  $\beta$ -glucosidase treatment as indicated. In each case, 100  $\mu$ L of the collected peak(s) was incubated  $\pm$   $\beta$ -glucosidase (10  $\mu$ L of 15 mg mL<sup>-1</sup> stock) for 2 h at 37°C, followed by heating to 99°C for 3 min, and 50  $\mu$ L re-injected for chromatography. To facilitate the visualization, chromatograms of the collected peaks were offset by 100 unit increases relative to the baseline of the standards. The difference in retention times between part **(a)** and **(b)** are likely due to small changes in pH.

***OsPDX1.3a*** (LOC\_Os07g01020)

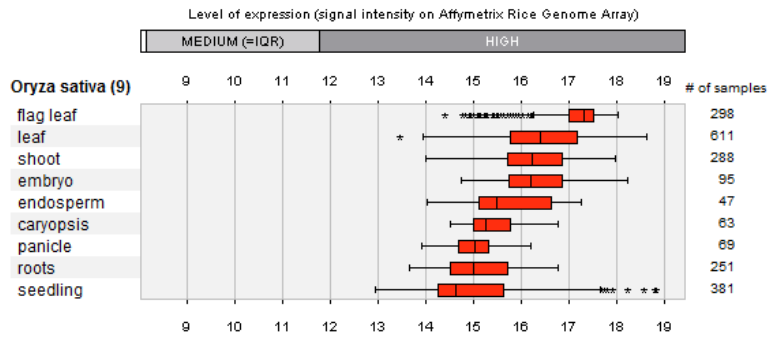

***OsPDX1.3b*** (LOC\_Os10g01080)

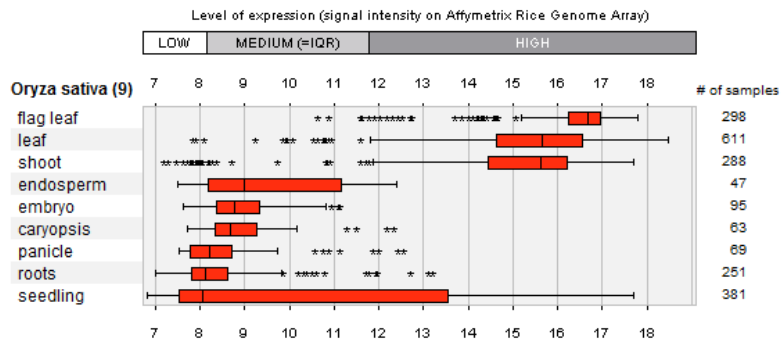

***OsPDX1.3c*** (LOC\_Os11g48080)

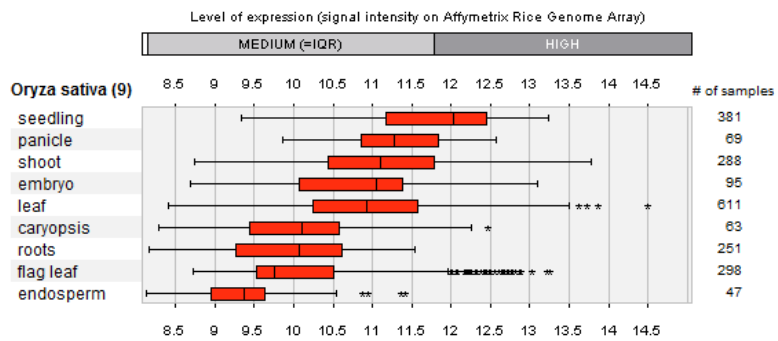

***OsPDX2*** (LOC\_Os02g03740)

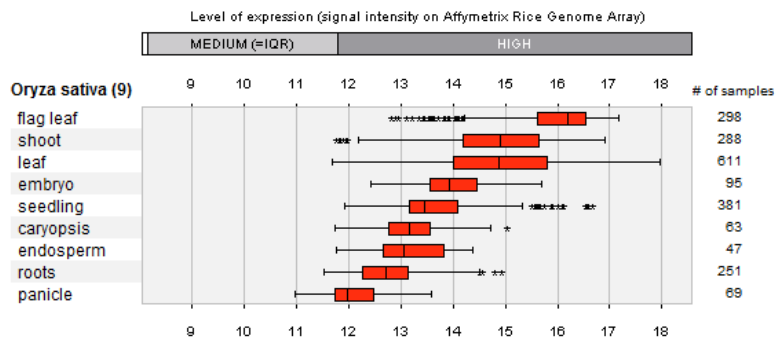

**Figure S4. Rice *PDX* gene expression patterns across different tissues.**  
Data were computationally generated using Genevestigator (Hruz et al., 2008).

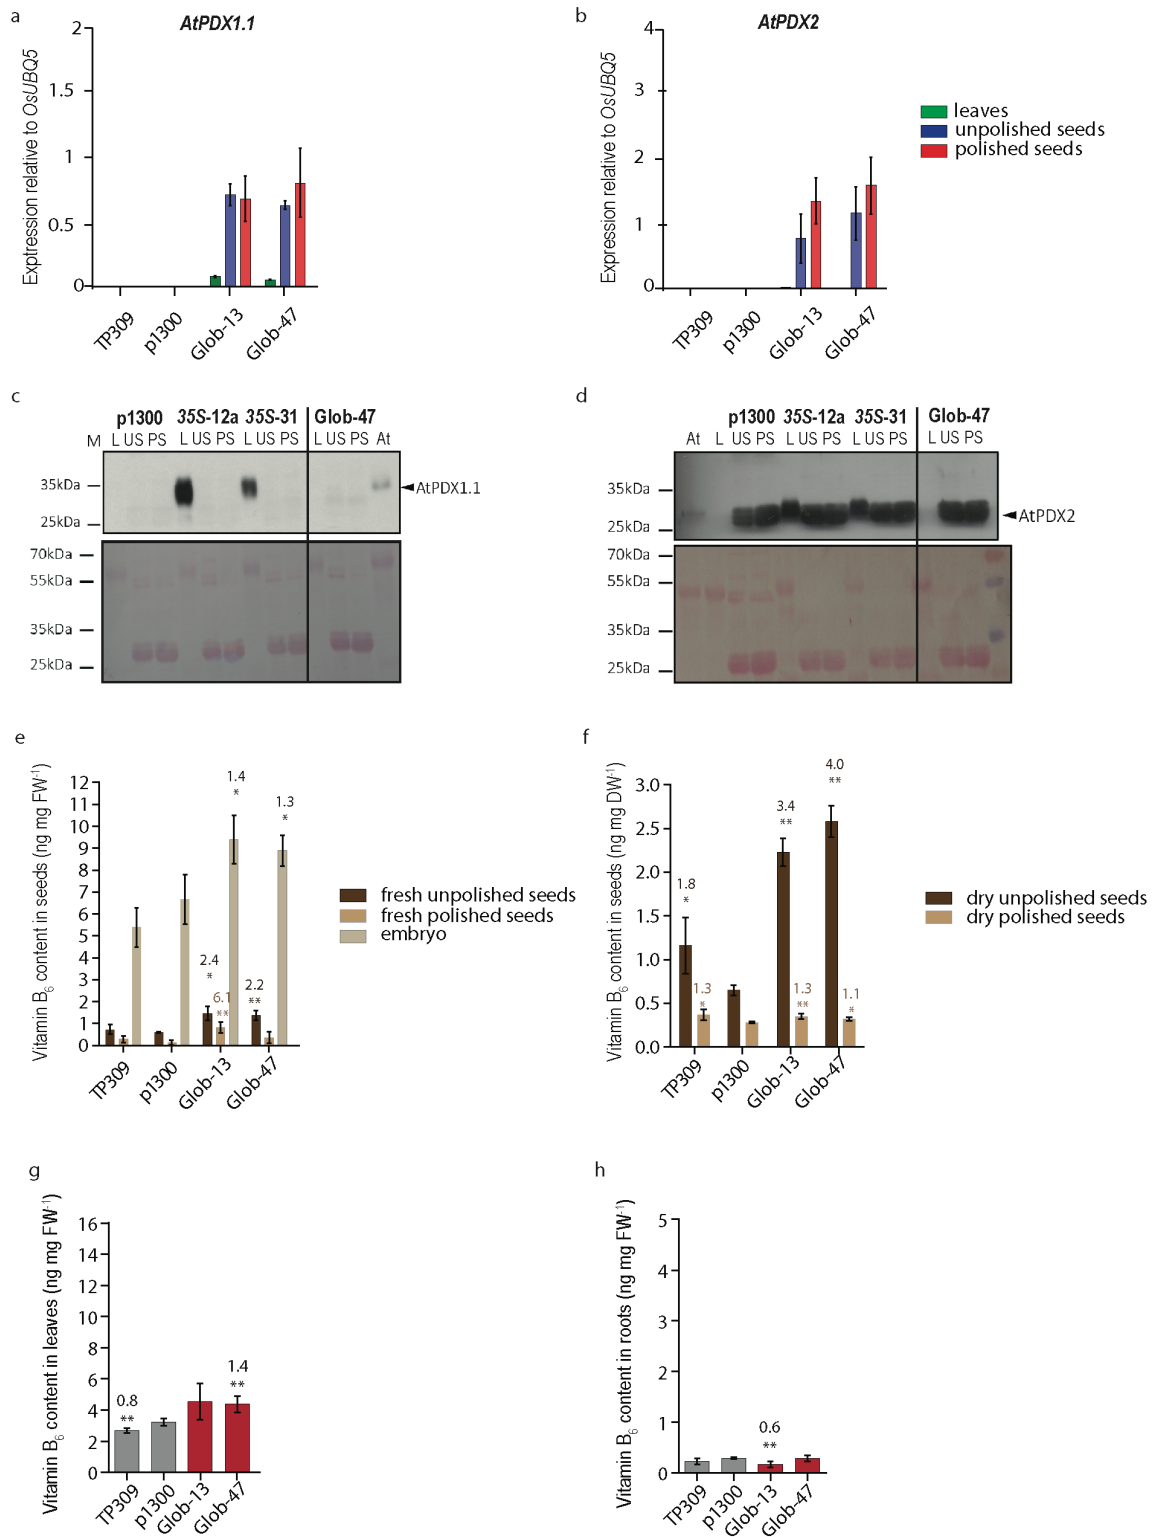

**Figure S5. PDX transgene expression, protein accumulation and vitamin B<sub>6</sub> content, in the rice *Glob* lines**

(a) *AtPDX1.1* and (b) *AtPDX2* transcript expression levels in *Glob* transgenic rice lines (T<sub>2</sub> generation) compared to wild-type (TP309) and the empty vector control (p1300). Average  $\pm$  S.D. of 3 biological replicates. Tukey's multiple comparison test ( $p < 0.05$ ) for each tissue. Western blot analysis of (c) *AtPDX1.1* and (d) *AtPDX2* protein abundance (upper panel) and Ponceau staining of the nitrocellulose membrane (lower panel) in control and transgenic rice lines. Fifty micrograms of total rice proteins and 30  $\mu$ g of total Arabidopsis leaf proteins were probed with peptide antibodies specific to *AtPDX1.1* (Raschke et al., 2011) or *AtPDX2* (Tambasco-Studart et al.,

2007). M: protein molecular-weight marker; L: leaves; US: unpolished seeds; PS: polished seeds; At: *Arabidopsis thaliana*. **(a-h)** Vitamin B<sub>6</sub> measurements by yeast bioassay, *PDX* transgene expression levels and immunochemical analyses of the *Glob* lines presented in **Figure S5** were performed simultaneously to the analysis of the *35S* lines presented in **Figures 2 and 7**. **(e)** Vitamin B<sub>6</sub> content in fresh mature unpolished and polished seeds and in the embryo from plants in the T<sub>2</sub> generation grown in the greenhouse. Average ± S.D. of 4 biological replicates. Student's *t*-test (p1300 vs transgenic lines), \*  $p < 0.05$ , \*\*  $p < 0.01$ . **(f)** Vitamin B<sub>6</sub> content in dry mature unpolished and polished seeds of the samples as in **(e)**. **(g)** Vitamin B<sub>6</sub> content in leaf sample extracts of *Glob* lines in the T<sub>2</sub> generation compared to wild-type (TP309) and empty vector control (p1300). Average ± S.D. of 4 biological replicates. Student's *t* test (p1300 vs transgenic lines and TP309), \*  $p < 0.05$ , \*\*  $p < 0.01$ . **(h)** Vitamin B<sub>6</sub> content in root sample extracts from mature plants in the T<sub>2</sub> generation grown under greenhouse conditions. Average ± S.D. of 4 biological replicates. Student's *t*-test (p1300 vs transgenic lines), \*  $p < 0.05$ , \*\*  $p < 0.01$ . Values above the bars represent the fold increase compared to p1300.
