# Supplementary material for: Enhancement of vitamin B6 levels in rice expressing Arabidopsis vitamin B6 biosynthesis de novo genes
Source: PubMed Central journal article supplement (PMC6852651; doi:10.1111/tpj.14379), 2019-07-11
Supplement: TPJ-99-1047-s002.pdf [file TPJ-99-1047-s002.pdf]

**Table S1. Primers used for the molecular characterization of generated transgenic rice lines.**

| Target gene                           | Gene reference | Primer name                        | Primer sequence (5'-3')                            |
|---------------------------------------|----------------|------------------------------------|----------------------------------------------------|
| <b><i>AtPDX1.1</i></b><br>(construct) | At2g38230      | AtPDX1.1-CDS-F<br>AtPDX1-plasmid-R | GTGAGGAGTGTGAACGGAGC<br>ACAATCAGTAAATTGAACGGAG     |
| <b><i>AtPDX2</i></b><br>(construct)   | At5g60540      | AtPDX2-CDS-F<br>AtPDX2-plasmid-R   | GGCAGACAGAGCAGTTGGTC<br>GGAACTACTCACACATTATTCTGGAG |
| <b><i>hptII</i></b>                   | -              | hptII-F<br>hptII-R                 | TCTCGATGAGCTGATGCTTTGG<br>AGTACTTCTACACAGCCATCGG   |

**Table S2. Primers used for real-time quantitative PCR analysis.**

| Target gene             | Gene reference | Primer name                     | Primer sequence (5'-3')                           |
|-------------------------|----------------|---------------------------------|---------------------------------------------------|
| <b><i>AtPDX1.1</i></b>  | At2g38230      | AtPDX1.1t-F<br>AtPDX1.1t-R      | GATGATAAGGTTGAGAGGTTCCG<br>GCATATCTCATTAAAGCAGGGC |
| <b><i>AtPDX2</i></b>    | At5g60540      | AtPDX2t-F<br>AtPDX2t-R          | GCTCTACGTGAGTTTGTAAAG ATG<br>CTCTTTCTGACCAACTGCTC |
| <b><i>OsPDX1.3a</i></b> | LOC_Os07g01020 | OsPDX1.3a-F<br>OsPDX1.3a-R      | GCCTTATCCTTCTTTGCTA<br>CTGGCTGGCTGGTGTCTAATTC     |
| <b><i>OsPDX1.3b</i></b> | LOC_Os10g01080 | OsPDX1.3a&1.3b-F<br>OsPDX1.3b-R | TTGGCATCAACCTCTCCG<br>AGGAAGGATGGCACTCTACG        |
| <b><i>OsPDX1.3c</i></b> | LOC_Os11g48080 | OsPDX1.3c-F<br>OsPDX1.3c-R      | GTCGGCATCAACCTCAACG<br>AGAGGGAGCAGGAGCAGGA        |
| <b><i>OsPDX2</i></b>    | LOC_Os02g03740 | OsPDX2-F<br>OsPDX2-R            | CCCATCTTCGAGTAGCTCATG<br>CTCAACTTTCTCTATTGTCACC   |
| <b><i>OsUBQ5</i></b>    | LOC_Os01g22490 | UBQ5-F<br>UBQ5-R                | ACCACTTCGACCGCCACTACT<br>ACGCCTAAGCCTGCTGGTT      |
